# Supplementary material for: Rb8Nb10Ge6O41: a new niobium-germanate crystal featuring unique one-dimensional [Nb7O30]∞ chains and wide mid-IR transparency
Source: Royal Society of Chemistry journal article supplement (doi:10.1039/d3dt04267g), 2024-01-01
Supplement: d3dt04267g1.pdf [file d3dt04267g1.pdf]

## Electronic Supplementary Information (ESI)

### **Rb<sub>8</sub>Nb<sub>10</sub>Ge<sub>6</sub>O<sub>41</sub>: A new niobium-germanate crystal featuring unique one-dimensional [Nb<sub>7</sub>O<sub>30</sub>]<sub>∞</sub> chains and wide mid-IR transparency**

Jing Chai,<sup>a</sup> Yuheng She,<sup>a</sup> Jinmiao Jiao,<sup>a</sup> Lili Li,<sup>b</sup> Ning Ye,<sup>a</sup> Zhanggui Hu,<sup>a</sup> Yicheng Wu<sup>a</sup> and Conggang Li<sup>\*a</sup>

<sup>a</sup>*Tianjin Key Laboratory of Functional Crystal Materials, Institute of Functional Crystal, Tianjin University of Technology, Tianjin 300384, China.*

<sup>b</sup>*State Key Laboratory of Crystal Materials and Institute of Crystal Materials, Shandong University, Jinan 250100, China.*

**\*Corresponding author**, E-mail address: cgli@email.tjut.edu.cn

1. **Table S1.** The final atomic coordinates ( $\times 10^4$ ) and equivalent isotropic displacement parameters ( $\text{\AA}^2 \times 10^3$ ) for Rb<sub>8</sub>Nb<sub>10</sub>Ge<sub>6</sub>O<sub>41</sub>, U(eq) is defined as one-third of the trace of the orthogonalized U<sub>ij</sub> tensor, and the BVS for each atom in asymmetric unit.
2. **Table S1.** Selected bond lengths ( $\text{\AA}$ ) and angles (deg.) for Rb<sub>8</sub>Nb<sub>10</sub>Ge<sub>6</sub>O<sub>41</sub>.
3. **Fig. S1.** EDS observations of Rb<sub>8</sub>Nb<sub>10</sub>Ge<sub>6</sub>O<sub>41</sub>. (a) Surface morphology of Rb<sub>8</sub>Nb<sub>10</sub>Ge<sub>6</sub>O<sub>41</sub>. (b) atomic ratio of various elements. (c-f) Rb, Nb, Ge, and O mapping results, respectively.

**Table S1.** The final atomic coordinates ( $\times 10^4$ ) and equivalent isotropic displacement parameters ( $\text{\AA}^2 \times 10^3$ ) for  $\text{Rb}_8\text{Nb}_{10}\text{Ge}_6\text{O}_{41}$ ,  $U(\text{eq})$  is defined as one-third of the trace of the orthogonalized  $U^{ij}$  tensor, and the BVS for each atom in asymmetric unit.

| <b>Atom</b>  | <b>x</b> | <b>y</b> | <b>z</b> | <b>U(eq)</b> | <b>BVS</b> |
|--------------|----------|----------|----------|--------------|------------|
| <b>Nb(1)</b> | 5322(2)  | 6681(1)  | 3654(1)  | 26(1)        | 5.22       |
| <b>Rb(1)</b> | 10125(2) | 8338(1)  | 3485(1)  | 40(1)        | 0.94       |
| <b>Ge(1)</b> | 0        | 3571(2)  | 2500     | 19(1)        | 4.08       |
| <b>O(1)</b>  | 7345(14) | 7090(8)  | 4129(4)  | 37(3)        | 2.03       |
| <b>Nb(2)</b> | 5000     | 5000     | 5000     | 41(1)        | 5.38       |
| <b>Ge(2)</b> | 2124(2)  | 5758(1)  | 2559(1)  | 22(1)        | 4.32       |
| <b>Rb(2)</b> | -156(3)  | 4944(2)  | 4074(1)  | 57(1)        | 0.85       |
| <b>O(2)</b>  | 3680(13) | 7545(8)  | 4138(4)  | 35(3)        | 1.98       |
| <b>Nb(3)</b> | 2916(2)  | 7656(1)  | 4989(1)  | 34(1)        | 5.12       |
| <b>O(3)</b>  | 4846(16) | 5444(9)  | 4144(4)  | 49(3)        | 1.94       |
| <b>O(4)</b>  | 3190(17) | 6440(9)  | 3111(4)  | 54(3)        | 1.97       |
| <b>O(5)</b>  | 6500(20) | 3830(10) | 4765(5)  | 45(4)        | 1.69       |
| <b>O(6)</b>  | 2708(17) | 4148(9)  | 4889(4)  | 56(3)        | 1.87       |
| <b>O(7)</b>  | 585(16)  | 7008(10) | 4818(5)  | 56(3)        | 1.93       |
| <b>O(8)</b>  | 3151(19) | 5678(9)  | 1875(4)  | 62(4)        | 2.00       |
| <b>O(9)</b>  | 0        | 6382(14) | 2500     | 98(9)        | 1.78       |
| <b>O(10)</b> | 1664(12) | 4439(8)  | 2831(4)  | 28(2)        | 2.03       |
| <b>O(11)</b> | 1040(12) | 2908(7)  | 1920(4)  | 27(2)        | 2.13       |

**Table S2.** Selected bond lengths (Å) and angles (deg.) for Rb<sub>8</sub>Nb<sub>10</sub>Ge<sub>6</sub>O<sub>41</sub>

|               |           |                      |           |
|---------------|-----------|----------------------|-----------|
| Nb(1)-O(1)    | 1.878(10) | Ge(2)-O(10)          | 1.782(9)  |
| Nb(1)-O(3)    | 1.916(10) | Rb(2)-O(6)           | 2.927(11) |
| Nb(1)-O(2)    | 1.931(10) | Rb(2)-O(7)           | 3.101(12) |
| Nb(1)-O(4)    | 1.984(11) | Rb(2)-O(10)          | 3.122(9)  |
| Nb(1)-O(8)#1  | 2.041(10) | Rb(2)-O(8)#9         | 3.162(12) |
| Nb(1)-O(11)#2 | 2.057(9)  | Rb(2)-O(6)#11        | 3.164(13) |
| Rb(1)-O(1)    | 2.921(10) | Rb(2)-O(2)#12        | 3.174(11) |
| Rb(1)-O(3)#7  | 3.003(11) | Rb(2)-O(5)#6         | 3.187(14) |
| Rb(1)-O(10)#7 | 3.068(9)  | Rb(2)-O(11)#9        | 3.421(9)  |
| Rb(1)-O(2)#3  | 3.119(9)  | Rb(2)-O(7)#11        | 3.471(12) |
| Rb(1)-O(5)#7  | 3.137(14) | O(2)-Nb(3)           | 1.973(9)  |
| Rb(1)-O(11)#2 | 3.144(9)  | Nb(3)-O(7)           | 1.912(12) |
| Rb(1)-O(9)#3  | 3.273(13) | Nb(3)-O(6)#4         | 1.925(11) |
| Rb(1)-O(8)#2  | 3.343(12) | Nb(3)-O(5)#10        | 1.974(13) |
| Rb(1)-O(4)#3  | 3.349(13) | Nb(3)-O(7)#8         | 2.028(12) |
| Rb(1)-O(7)#3  | 3.407(12) | O(1)-Nb(1)-O(3)      | 92.3(4)   |
| Rb(1)-O(6)#7  | 3.634(12) | O(1)-Nb(1)-O(2)      | 91.1(4)   |
| Ge(1)-O(11)#9 | 1.705(9)  | O(3)-Nb(1)-O(2)      | 91.2(4)   |
| Ge(1)-O(11)   | 1.705(9)  | O(1)-Nb(1)-O(4)      | 172.6(4)  |
| Ge(1)-O(10)   | 1.779(9)  | O(3)-Nb(1)-O(4)      | 94.7(4)   |
| Ge(1)-O(10)#9 | 1.779(9)  | O(2)-Nb(1)-O(4)      | 86.6(5)   |
| O(1)-Nb(3)#8  | 2.026(9)  | O(1)-Nb(1)-O(8)#1    | 93.7(5)   |
| O(1)-Rb(2)#3  | 3.232(10) | O(3)-Nb(1)-O(8)#1    | 86.2(4)   |
| Nb(2)-O(5)    | 1.893(14) | O(2)-Nb(1)-O(8)#1    | 174.6(5)  |
| Nb(2)-O(5)#10 | 1.893(14) | O(4)-Nb(1)-O(8)#1    | 88.9(5)   |
| Nb(2)-O(3)    | 1.982(10) | O(1)-Nb(1)-O(11)#2   | 87.1(4)   |
| Nb(2)-O(3)#10 | 1.982(10) | O(3)-Nb(1)-O(11)#2   | 173.8(4)  |
| Nb(2)-O(6)#10 | 1.988(11) | O(2)-Nb(1)-O(11)#2   | 95.0(4)   |
| Nb(2)-O(6)    | 1.988(11) | O(4)-Nb(1)-O(11)#2   | 86.2(4)   |
| Ge(2)-O(4)    | 1.680(10) | O(8)#1-Nb(1)-O(11)#2 | 87.7(4)   |
| Ge(2)-O(8)    | 1.694(10) | O(1)-Rb(1)-O(3)#7    | 103.3(3)  |
| Ge(2)-O(9)    | 1.731(8)  | O(1)-Rb(1)-O(10)#7   | 173.7(3)  |

|                       |           |                       |          |
|-----------------------|-----------|-----------------------|----------|
| O(3)#7-Rb(1)-O(10)#7  | 80.5(3)   | O(1)-Rb(1)-O(7)#3     | 52.0(3)  |
| O(1)-Rb(1)-O(2)#3     | 100.1(3)  | O(3)#7-Rb(1)-O(7)#3   | 90.0(3)  |
| O(3)#7-Rb(1)-O(2)#3   | 92.5(3)   | O(10)#7-Rb(1)-O(7)#3  | 123.6(3) |
| O(10)#7-Rb(1)-O(2)#3  | 74.5(2)   | O(2)#3-Rb(1)-O(7)#3   | 50.3(3)  |
| O(1)-Rb(1)-O(5)#7     | 53.1(3)   | O(5)#7-Rb(1)-O(7)#3   | 49.1(3)  |
| O(3)#7-Rb(1)-O(5)#7   | 52.5(3)   | O(11)#2-Rb(1)-O(7)#3  | 105.0(3) |
| O(10)#7-Rb(1)-O(5)#7  | 128.8(3)  | O(9)#3-Rb(1)-O(7)#3   | 102.8(3) |
| O(2)#3-Rb(1)-O(5)#7   | 87.2(3)   | O(8)#2-Rb(1)-O(7)#3   | 132.3(3) |
| O(1)-Rb(1)-O(11)#2    | 53.0(2)   | O(4)#3-Rb(1)-O(7)#3   | 78.9(3)  |
| O(3)#7-Rb(1)-O(11)#2  | 107.1(3)  | O(1)-Rb(1)-O(6)#7     | 91.5(3)  |
| O(10)#7-Rb(1)-O(11)#2 | 131.1(2)  | O(3)#7-Rb(1)-O(6)#7   | 48.4(3)  |
| O(2)#3-Rb(1)-O(11)#2  | 149.2(3)  | O(10)#7-Rb(1)-O(6)#7  | 87.3(3)  |
| O(5)#7-Rb(1)-O(11)#2  | 86.4(3)   | O(2)#3-Rb(1)-O(6)#7   | 48.0(2)  |
| O(1)-Rb(1)-O(9)#3     | 85.0(2)   | O(5)#7-Rb(1)-O(6)#7   | 48.1(3)  |
| O(3)#7-Rb(1)-O(9)#3   | 167.2(3)  | O(11)#2-Rb(1)-O(6)#7  | 134.5(2) |
| O(10)#7-Rb(1)-O(9)#3  | 92.2(2)   | O(9)#3-Rb(1)-O(6)#7   | 142.3(2) |
| O(2)#3-Rb(1)-O(9)#3   | 95.6(2)   | O(8)#2-Rb(1)-O(6)#7   | 98.5(2)  |
| O(5)#7-Rb(1)-O(9)#3   | 137.7(3)  | O(4)#3-Rb(1)-O(6)#7   | 96.9(2)  |
| O(11)#2-Rb(1)-O(9)#3  | 69.90(17) | O(7)#3-Rb(1)-O(6)#7   | 49.3(3)  |
| O(1)#7-Rb(1)-O(8)#2   | 106.5(3)  | O(11)#9-Ge(1)-O(11)   | 122.1(6) |
| O(3)#7-Rb(1)-O(8)#2   | 50.1(3)   | O(11)#9-Ge(1)-O(10)   | 106.4(4) |
| O(10)#7-Rb(1)-O(8)#2  | 79.8(3)   | O(11)-Ge(1)-O(10)     | 107.8(4) |
| O(2)#3-Rb(1)-O(8)#2   | 137.8(3)  | O(11)#9-Ge(1)-O(10)#9 | 107.8(4) |
| O(5)#7-Rb(1)-O(8)#2   | 83.4(3)   | O(11)-Ge(1)-O(10)#9   | 106.4(4) |
| O(11)#2-Rb(1)-O(8)#2  | 71.1(3)   | O(10)-Ge(1)-O(10)#9   | 105.2(6) |
| O(9)#3-Rb(1)-O(8)#2   | 118.5(2)  | O(5)-Nb(2)-O(5)#10    | 180.0    |
| O(1)-Rb(1)-O(4)#3     | 101.8(3)  | O(5)-Nb(2)-O(3)       | 89.0(5)  |
| O(3)#7-Rb(1)-O(4)#3   | 137.0(3)  | O(5)#10-Nb(2)-O(3)    | 91.0(5)  |
| O(10)#7-Rb(1)-O(4)#3  | 72.2(2)   | O(5)-Nb(2)-O(3)#10    | 91.0(5)  |
| O(2)#3-Rb(1)-O(4)#3   | 48.9(3)   | O(5)#10-Nb(2)-O(3)#10 | 89.0(5)  |
| O(5)#7-Rb(1)-O(4)#3   | 127.7(3)  | O(3)-Nb(2)-O(3)#10    | 180.0(7) |
| O(11)#2-Rb(1)-O(4)#3  | 115.8(3)  | O(5)-Nb(2)-O(6)#10    | 87.9(6)  |
| O(9)#3-Rb(1)-O(4)#3   | 47.8(2)   | O(5)#10-Nb(2)-O(6)#10 | 92.1(6)  |
| O(8)#2-Rb(1)-O(4)#3   | 147.2(3)  | O(3)-Nb(2)-O(6)#10    | 91.0(4)  |

|                       |          |                       |          |
|-----------------------|----------|-----------------------|----------|
| O(3)#10-Nb(2)-O(6)#10 | 89.0(4)  | O(7)-Rb(2)-O(1)#6     | 52.6(3)  |
| O(5)-Nb(2)-O(6)       | 92.1(6)  | O(10)-Rb(2)-O(1)#6    | 115.9(2) |
| O(5)#10-Nb(2)-O(6)    | 87.9(6)  | O(8)#9-Rb(2)-O(1)#6   | 53.2(2)  |
| O(3)-Nb(2)-O(6)       | 89.0(4)  | O(6)#11-Rb(2)-O(1)#6  | 49.3(3)  |
| O(3)#10-Nb(2)-O(6)    | 91.0(4)  | O(2)#12-Rb(2)-O(1)#6  | 164.8(3) |
| O(6)#10-Nb(2)-O(6)    | 180.0    | O(5)#6-Rb(2)-O(1)#6   | 85.1(3)  |
| O(4)-Ge(2)-O(8)       | 118.8(6) | O(6)-Rb(2)-O(11)#9    | 106.3(3) |
| O(4)-Ge(2)-O(9)       | 103.8(6) | O(7)-Rb(2)-O(11)#9    | 171.7(3) |
| O(8)-Ge(2)-O(9)       | 110.5(5) | O(10)-Rb(2)-O(11)#9   | 50.2(2)  |
| O(4)-Ge(2)-O(10)      | 107.6(4) | O(8)#9-Rb(2)-O(11)#9  | 69.8(2)  |
| O(8)-Ge(2)-O(10)      | 109.4(5) | O(6)#11-Rb(2)-O(11)#9 | 128.6(3) |
| O(9)-Ge(2)-O(10)      | 105.8(6) | O(2)#12-Rb(2)-O(11)#9 | 52.8(2)  |
| O(6)-Rb(2)-O(7)       | 80.1(3)  | O(5)#6-Rb(2)-O(11)#9  | 81.1(3)  |
| O(6)-Rb(2)-O(10)      | 100.2(3) | O(1)#6-Rb(2)-O(11)#9  | 122.1(2) |
| O(7)-Rb(2)-O(10)      | 124.3(3) | O(6)-Rb(2)-O(7)#11    | 52.4(3)  |
| O(6)-Rb(2)-O(8)#9     | 175.8(3) | O(7)-Rb(2)-O(7)#11    | 102.6(3) |
| O(7)-Rb(2)-O(8)#9     | 103.5(3) | O(10)-Rb(2)-O(7)#11   | 121.6(3) |
| O(10)-Rb(2)-O(8)#9    | 76.1(2)  | O(8)#9-Rb(2)-O(7)#11  | 127.8(3) |
| O(6)-Rb(2)-O(6)#11    | 95.0(3)  | O(6)#11-Rb(2)-O(7)#11 | 71.4(3)  |
| O(7)-Rb(2)-O(6)#11    | 54.4(3)  | O(2)#12-Rb(2)-O(7)#11 | 48.8(3)  |
| O(10)-Rb(2)-O(6)#11   | 164.2(3) | O(5)#6-Rb(2)-O(7)#11  | 44.5(3)  |
| O(8)#9-Rb(2)-O(6)#11  | 88.8(3)  | O(1)#6-Rb(2)-O(7)#11  | 120.1(3) |
| O(6)-Rb(2)-O(2)#12    | 54.2(3)  | O(11)#9-Rb(2)-O(7)#11 | 85.6(2)  |
| O(7)-Rb(2)-O(2)#12    | 134.2(3) | O(7)-Nb(3)-O(6)#4     | 100.2(6) |
| O(10)-Rb(2)-O(2)#12   | 73.0(2)  | O(7)-Nb(3)-O(2)       | 91.7(4)  |
| O(8)#9-Rb(2)-O(2)#12  | 122.3(3) | O(6)#4-Nb(3)-O(2)     | 91.3(4)  |
| O(6)#11-Rb(2)-O(2)#12 | 120.1(3) | O(7)-Nb(3)-O(5)#10    | 81.3(6)  |
| O(6)-Rb(2)-O(5)#6     | 95.5(3)  | O(6)#4-Nb(3)-O(5)#10  | 170.5(4) |
| O(7)-Rb(2)-O(5)#6     | 103.7(3) | O(2)-Nb(3)-O(5)#10    | 98.1(5)  |
| O(10)-Rb(2)-O(5)#6    | 131.3(3) | O(7)-Nb(3)-O(1)#14    | 94.4(4)  |
| O(8)#9-Rb(2)-O(5)#6   | 85.6(3)  | O(6)#4-Nb(3)-O(1)#14  | 85.0(4)  |
| O(6)#11-Rb(2)-O(5)#6  | 50.2(3)  | O(2)-Nb(3)-O(1)#14    | 173.4(4) |
| O(2)#12-Rb(2)-O(5)#6  | 80.0(3)  | O(5)#10-Nb(3)-O(1)#14 | 85.5(5)  |
| O(6)-Rb(2)-O(1)#6     | 130.9(3) | O(7)-Nb(3)-O(7)#8     | 167.0(2) |

|                     |         |                      |         |
|---------------------|---------|----------------------|---------|
| O(6)#4-Nb(3)-O(7)#8 | 92.9(5) | O(5)#10-Nb(3)-O(7)#8 | 86.0(6) |
| O(2)-Nb(3)-O(7)#8   | 87.1(4) | O(1)#14-Nb(3)-O(7)#8 | 87.6(4) |

Symmetry transformations used to generate equivalent atoms:

#1  $-x+1, y, -z+1/2$     #2  $x+1/2, y+1/2, -z+1/2$     #3  $x+1, y, z$   
#4  $-x+1/2, y+1/2, z$     #5  $-x+3/2, y-1/2, z$     #6  $x-1, y, z$   
#7  $-x+3/2, y+1/2, z$     #8  $x+1/2, -y+3/2, -z+1$     #9  $-x, y, -z+1/2$   
#10  $-x+1, -y+1, -z+1$     #11  $-x, -y+1, -z+1$     #12  $-x+1/2, y-1/2, z$   
#13  $x-3/2, y-1/2, -z+1/2$     #14  $x-1/2, -y+3/2, -z+1$   
#15

$x-1/2, y-1/2, -z+1/2$

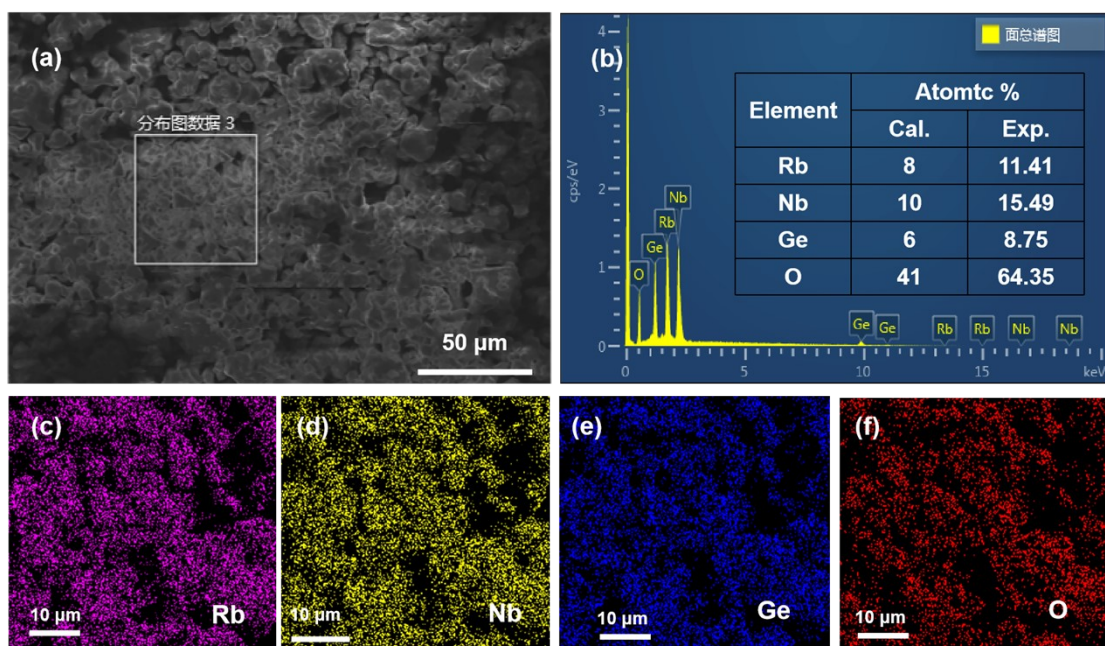

**Fig S1.** EDS observations of  $\text{Rb}_8\text{Nb}_{10}\text{Ge}_6\text{O}_{41}$ . (a) surface morphology of  $\text{Rb}_8\text{Nb}_{10}\text{Ge}_6\text{O}_{41}$ . (b) atomic ratio of various elements. (c-f) Rb, Nb, Ge, and O mapping results, respectively.
